# Supplementary material for: Prevalence of retinopathy in prediabetes: protocol for a systematic review and meta-analysis
Source: PubMed Central journal article supplement — BMJ Open. 2021 Jan 7;11(1):e040997. doi: 10.1136/bmjopen-2020-040997 (PMC7797244; doi:10.1136/bmjopen-2020-040997), 2021-01-07
Supplement: bmjopen-2020-040997.draft_revisions.pdf [file bmjopen-2020-040997.draft_revisions.pdf]

# BMJ Open

BMJ Open is committed to open peer review. As part of this commitment we make the peer review history of every article we publish publicly available.

When an article is published we post the peer reviewers' comments and the authors' responses online. We also post the versions of the paper that were used during peer review. These are the versions that the peer review comments apply to.

The versions of the paper that follow are the versions that were submitted during the peer review process. They are not the versions of record or the final published versions. They should not be cited or distributed as the published version of this manuscript.

BMJ Open is an open access journal and the full, final, typeset and author-corrected version of record of the manuscript is available on our site with no access controls, subscription charges or pay-per-view fees (<http://bmjopen.bmj.com>).

If you have any questions on BMJ Open's open peer review process please email [info.bmjopen@bmj.com](mailto:info.bmjopen@bmj.com)

# BMJ Open

## Prevalence of retinopathy in pre-diabetes: protocol for a systematic review and meta-analysis

|                               |                                                                                                                                                                                                                                                                                                                                                                                                                                                                                                                                                                                                                                                           |
|-------------------------------|-----------------------------------------------------------------------------------------------------------------------------------------------------------------------------------------------------------------------------------------------------------------------------------------------------------------------------------------------------------------------------------------------------------------------------------------------------------------------------------------------------------------------------------------------------------------------------------------------------------------------------------------------------------|
| Journal:                      | <i>BMJ Open</i>                                                                                                                                                                                                                                                                                                                                                                                                                                                                                                                                                                                                                                           |
| Manuscript ID                 | bmjopen-2020-040997                                                                                                                                                                                                                                                                                                                                                                                                                                                                                                                                                                                                                                       |
| Article Type:                 | Protocol                                                                                                                                                                                                                                                                                                                                                                                                                                                                                                                                                                                                                                                  |
| Date Submitted by the Author: | 28-May-2020                                                                                                                                                                                                                                                                                                                                                                                                                                                                                                                                                                                                                                               |
| Complete List of Authors:     | Kirthi, Varo; King's College London Faculty of Life Sciences and Medicine, Ophthalmology Research Office<br>Nderitu, Paul; King's College Hospital NHS Foundation Trust, Ophthalmology<br>Alam, Uazman; University of Liverpool Institute of Ageing and Chronic Disease, Diabetes and Endocrinology Research<br>Evans, Jennifer; London School of Hygiene and Tropical Medicine, International Centre for Eye Health<br>Nevitt, Sarah; University of Liverpool, Department of Biostatistics<br>Malik, Rayaz A. ; Weill Cornell Medicine-Qatar, Medicine<br>Jackson, Timothy; King's College London, Ophthalmology; King's College Hospital, Ophthalmology |
| Keywords:                     | Diabetic retinopathy < DIABETES & ENDOCRINOLOGY, General diabetes < DIABETES & ENDOCRINOLOGY, Medical retina < OPHTHALMOLOGY, EPIDEMIOLOGY                                                                                                                                                                                                                                                                                                                                                                                                                                                                                                                |
|                               |                                                                                                                                                                                                                                                                                                                                                                                                                                                                                                                                                                                                                                                           |

SCHOLARONE™  
Manuscripts

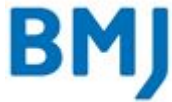

I, the Submitting Author has the right to grant and does grant on behalf of all authors of the Work (as defined in the below author licence), an exclusive licence and/or a non-exclusive licence for contributions from authors who are: i) UK Crown employees; ii) where BMJ has agreed a CC-BY licence shall apply, and/or iii) in accordance with the terms applicable for US Federal Government officers or employees acting as part of their official duties; on a worldwide, perpetual, irrevocable, royalty-free basis to BMJ Publishing Group Ltd ("BMJ") its licensees and where the relevant Journal is co-owned by BMJ to the co-owners of the Journal, to publish the Work in this journal and any other BMJ products and to exploit all rights, as set out in our [licence](#).

The Submitting Author accepts and understands that any supply made under these terms is made by BMJ to the Submitting Author unless you are acting as an employee on behalf of your employer or a postgraduate student of an affiliated institution which is paying any applicable article publishing charge ("APC") for Open Access articles. Where the Submitting Author wishes to make the Work available on an Open Access basis (and intends to pay the relevant APC), the terms of reuse of such Open Access shall be governed by a Creative Commons licence – details of these licences and which [Creative Commons](#) licence will apply to this Work are set out in our licence referred to above.

Other than as permitted in any relevant BMJ Author's Self Archiving Policies, I confirm this Work has not been accepted for publication elsewhere, is not being considered for publication elsewhere and does not duplicate material already published. I confirm all authors consent to publication of this Work and authorise the granting of this licence.

1  
2  
3 **1 TITLE:**  
4

5  
6 **2** Prevalence of retinopathy in pre-diabetes: protocol for a systematic review and meta-analysis  
7  
8  
9

10  
11 **3 AUTHORS:**  
12

13  
14 **4** Varo Kirthi <sup>1,2</sup> [v.kirthi@nhs.net](mailto:v.kirthi@nhs.net)  
15

16 **5** Paul Nderitu <sup>2</sup> [paulnderitu@nhs.net](mailto:paulnderitu@nhs.net)  
17

18 **6** Uazman Alam <sup>3,4</sup> [uazman.alam@liverpool.ac.uk](mailto:uazman.alam@liverpool.ac.uk)  
19

20 **7** Jennifer Evans <sup>5</sup> [jennifer.evans@lshtm.ac.uk](mailto:jennifer.evans@lshtm.ac.uk)  
21

22 **8** Sarah Nevitt <sup>3</sup> [sarah.nevitt@liverpool.ac.uk](mailto:sarah.nevitt@liverpool.ac.uk)  
23

24 **9** Rayaz A Malik <sup>6</sup> [ram2045@qatar-med.cornell.edu](mailto:ram2045@qatar-med.cornell.edu)  
25

26 **10** Timothy L Jackson <sup>1,2</sup> [t.jackson1@nhs.net](mailto:t.jackson1@nhs.net)  
27  
28

29  
30  
31  
32 **11 Institutional affiliations:** <sup>1</sup> King's College London; <sup>2</sup> King's College Hospital NHS Foundation  
33 Trust; <sup>3</sup> University of Liverpool; <sup>4</sup> Liverpool University Hospitals NHS Foundation Trust; <sup>5</sup>  
34 London School of Hygiene and Tropical Medicine; <sup>6</sup> Weill Cornell Medicine-Qatar  
35  
36  
37  
38  
39

40  
41 **14 Address for correspondence:** Dr Varo Kirthi, Faculty of Life Sciences and Medicine, King's  
42 College London, Ophthalmology Research Office, Normanby Building, King's College Hospital,  
43 London SE5 9RS  
44  
45  
46  
47  
48  
49

50  
51  
52 **17 ABSTRACT:**  
53

54 **18 Introduction:** There is growing evidence of a higher than expected prevalence of retinopathy  
55 in pre-diabetes. This paper presents the protocol of a systematic review and meta-analysis of  
56  
57  
58  
59  
60

1  
2  
3 20 retinopathy in pre-diabetes. The aim of the review is to estimate the prevalence of  
4  
5  
6 21 retinopathy in pre-diabetes and to summarise the current data.  
7  
8  
9

10 22 **Methods and analysis:** This protocol is developed in accordance with the Preferred Reporting  
11  
12 23 Items for Systematic Reviews and Meta-Analysis Protocols (PRISMA-P) guidelines. A  
13  
14 24 comprehensive electronic bibliographic search will be conducted in MEDLINE, EMBASE, Web  
15  
16  
17 25 of Science, CINAHL (Cumulative Index to Nursing and Allied Health Literature), Google Scholar  
18  
19 26 and the Cochrane Library. Eligible studies will report prevalence data for retinopathy on  
20  
21  
22 27 fundus photography in adults with pre-diabetes. No time restrictions will be placed on the  
23  
24 28 date of publication. Screening for eligible studies and data extraction will be conducted by  
25  
26 29 two reviewers independently, using defined inclusion criteria and pre-piloted data extraction  
27  
28  
29 30 forms. Disagreements between these reviewers will be resolved by a third (senior) reviewer.  
30  
31

32  
33 31 The primary outcome is the prevalence of any standard features of diabetic retinopathy on  
34  
35 32 fundus photography, as per International Clinical Diabetic Retinopathy Severity Scale (ICDRSS)  
36  
37 33 classification. Secondary outcomes are the prevalence of: (i) any retinal microvascular  
38  
39 34 abnormalities on fundus photography that are not standard features of diabetic retinopathy  
40  
41 35 as per ICDRSS classification and (ii) any macular microvascular abnormalities on fundus  
42  
43 36 photography, including but not limited to the presence of macular exudates, microaneurysms  
44  
45 37 and haemorrhages. Risk of bias for included studies will be assessed using a validated risk of  
46  
47 38 bias tool for prevalence studies. Pooled estimates for the pre-specified outcomes of interest  
48  
49 39 will be calculated using random effects meta-analytic techniques. Heterogeneity will be  
50  
51 40 assessed using the  $I^2$  statistic.  
52  
53  
54  
55  
56  
57  
58  
59  
60

1  
2  
3 41 **Ethics and dissemination:** Ethical approval is not required as this is a protocol for a systematic  
4  
5  
6 42 review and no primary data are to be collected. Findings will be disseminated through peer-  
7  
8 43 reviewed publications and presentations at national and international meetings including  
9  
10 44 Diabetes UK, European Association for the Study of Diabetes, American Diabetes Association  
11  
12  
13 45 and International Diabetes Federation conferences.

14  
15  
16  
17 46 **Registration details:** This protocol has been submitted to PROSPERO for registration. Any  
18  
19 47 protocol amendments will be updated on the PROSPERO database.

20  
21  
22  
23 48 **Abbreviations:** A full list of the abbreviations used in this protocol is provided in Appendix 1.  
24  
25  
26  
27  
28

#### 29 **STRENGTHS AND LIMITATIONS OF THIS STUDY:**

- 30  
31 50 • This systematic review protocol follows the Preferred Reporting Items for Systematic  
32  
33 51 Review and Meta-Analysis Protocols (PRISMA-P) guidelines, provided in Appendix 2.  
34  
35  
36 52 • This systematic review addresses an important gap in the current evidence by  
37  
38 53 estimating the prevalence of retinopathy in pre-diabetes.  
39  
40  
41 54 • There is potential for significant clinical and statistical heterogeneity in reporting of  
42  
43 55 prevalence data between different populations.  
44  
45  
46  
47  
48

#### 49 **BACKGROUND:**

50  
51  
52 57 Pre-diabetes is defined by blood glucose levels above the normal range, but below the  
53  
54 58 threshold for type 2 diabetes mellitus (1,2). The burden of prediabetes is enormous: it is  
55  
56  
57 59 currently estimated to affect 373 million people across the globe and this number is projected  
58  
59 60 to increase to 587 million (8.3% of the global adult population) by 2045 (3).  
60

1  
2  
3 61 Cohort analysis of people with pre-diabetes reveals an increased incidence of microvascular  
4  
5 62 and macrovascular disease, including an elevated all-cause mortality, compared to people  
6  
7  
8 63 with normal glucose metabolism (4,5). This suggests that end-organ complications of  
9  
10 64 hyperglycaemia may be occurring prior to the onset of overt diabetes (6). Furthermore,  
11  
12  
13 65 people with prediabetes and microvascular disease are more likely to develop overt diabetes  
14  
15 66 (7,8). In a population-based analysis of 49,072 participants with diabetes, the presence of  
16  
17 67 diabetic retinopathy (DR) was associated with an increased risk (hazard ratio 1.39, 95%  
18  
19 68 confidence interval 1.09-1.76) of cardiovascular death, non-fatal myocardial infarction or  
20  
21 69 stroke, after adjustment of traditional risk factors including HbA1c, lipid profile and blood  
22  
23 70 pressure (9). Despite ongoing debate on how best to identify people with pre-diabetes at high  
24  
25 71 risk of end-organ complications, long-term data show a reduction in both morbidity and  
26  
27 72 mortality following early lifestyle interventions (10).

28  
29  
30  
31  
32  
33  
34 73 A systematic review of 35 population-based studies of people with diabetes reported the  
35  
36 74 prevalence of DR, proliferative diabetic retinopathy (PDR), diabetic macular oedema (DMO)  
37  
38 75 and vision-threatening diabetic retinopathy (VTDR) as 34.6%, 7.0%, 6.8% and 10.2%,  
39  
40  
41 76 respectively (11). The early onset of retinopathy in pre-diabetes is of particular concern as DR  
42  
43  
44 77 remains one of the principal causes of vision loss in adults of working age in developed  
45  
46 78 countries, with considerable health and socioeconomic consequences (12). Given projections  
47  
48 79 that up to 70% of people with pre-diabetes may eventually develop diabetes during their  
49  
50  
51 80 lifespan, early identification of retinopathy is a significant health priority (6). It is estimated  
52  
53 81 that up to 95% of vision loss in diabetes is preventable or treatable, if detected early (13).

54  
55  
56  
57 82 Although many studies have reported retinopathy changes in pre-diabetes, there has been  
58  
59  
60 83 no systematic review or meta-analysis of the literature to estimate an overall prevalence.

1  
2  
3 84 Understanding the prevalence of retinopathy may not only focus attention on early  
4  
5 85 interventions but may also help refine diagnostic criteria and risk stratification for pre-  
6  
7 86 diabetes. The aim of this systematic review is to estimate the prevalence of retinopathy  
8  
9 87 detected on fundus photography in adults with pre-diabetes.  
10  
11  
12  
13  
14  
15

## 16 88 **METHODS AND ANALYSIS:**

17  
18 89 **Study design:** Comprehensive literature searches of electronic bibliographic databases will be  
19  
20 90 conducted in MEDLINE (access via OVID), EMBASE (access via OVID), Web of Science, CINAHL  
21  
22 91 (Cumulative Index to Nursing and Allied Health Literature), Google Scholar and the Cochrane  
23  
24 92 Library. No time restrictions will be placed on the date of publication. All search strategies will  
25  
26 93 be independently reviewed by an expert information specialist using the Peer Review of  
27  
28 94 Electronic Search Strategies (PRESS) checklist and a draft MEDLINE search strategy is included  
29  
30 95 in Appendix 3 (14). Additional articles will be identified by searching the references of  
31  
32 96 included studies and other review articles identified during the course of the searches. Results  
33  
34 97 from the database searches will be merged using an electronic reference manager to facilitate  
35  
36 98 removal of duplicates. Trial registries such as ClinicalTrials.gov will be consulted to track  
37  
38 99 studies that may not have been indexed in the databases. Relevant publications will be  
39  
40 100 retrieved manually if electronic access is not available.  
41  
42  
43  
44  
45  
46  
47  
48

49 101 **Participants, eligibility and setting:** Inclusion criteria will be adults over 18 years of age who  
50  
51 102 have pre-diabetes defined either by World Health Organisation (WHO) or American Diabetes  
52  
53 103 Association (ADA) criteria (1,2). This includes impaired fasting glucose (IFG) and impaired  
54  
55 104 glucose tolerance (IGT) as subgroups of pre-diabetes. Population-based cohort or cross-  
56  
57 105 sectional studies from any country in any setting will be considered, provided they have been  
58  
59  
60



1  
2  
3 106 reported in English. Studies must report prevalence data for retinopathy detected on fundus  
4  
5  
6 107 photography, using any accepted method (e.g. 1-, 2-, 3- or 7-field dilated stereoscopic colour  
7  
8 108 fundus photography) at least once in the study population. A lack of detail on the method  
9  
10  
11 109 used or quality of images taken will be documented but will not be considered an exclusion  
12  
13 110 criterion. Studies that report other methods of imaging, such as fluorescein angiography or  
14  
15 111 optical coherence tomography, will be included only if fundus photography data are also  
16  
17 112 provided. A lack of reporting of the definition of diabetes and/or retinopathy will be  
18  
19  
20 113 documented but will not be considered as a reason for exclusion.  
21  
22  
23

24 114 **Outcomes:** The primary outcome is the prevalence of any standard features of diabetic  
25  
26 115 retinopathy on fundus photography, as per International Clinical Diabetic Retinopathy  
27  
28 116 Severity Scale (ICDRSS) classification (15). This will be defined by the presence of any of the  
29  
30  
31 117 following features:  
32  
33  
34

- 35 118 (i) Microaneurysms  
36  
37  
38 119 (ii) Intraretinal haemorrhages  
39  
40  
41 120 (iii) Hard exudates  
42  
43 121 (iv) Cotton-wool spots  
44  
45 122 (v) Venous beading  
46  
47  
48 123 (vi) Intraretinal microvascular abnormalities (IRMAs)  
49  
50 124 (vii) New vessels at the optic disc (NVD) or elsewhere (NVE)  
51  
52 125 (viii) Vitreous or pre-retinal haemorrhage  
53  
54  
55

56 126 Secondary outcomes are the prevalence of: (i) any retinal microvascular abnormalities on  
57  
58 127 fundus photography that are not standard features of diabetic retinopathy as per ICDRSS  
59  
60

1  
2  
3 128 classification and (ii) any macular microvascular abnormalities on fundus photography,  
4  
5 129 including but not limited to the presence of macular exudates, microaneurysms or  
6  
7  
8 130 haemorrhages.  
9

10  
11  
12 131 If available, data on glycaemic parameters such as fasting glucose, two-hour oral glucose  
13  
14 132 tolerance test (OGTT) and HbA1c will be extracted. Similarly, if reported, prevalence data on  
15  
16  
17 133 cardiovascular parameters such as systolic and diastolic blood pressure, lipid profile and  
18  
19 134 metabolic syndrome will also be extracted. Metabolic syndrome will be defined as per  
20  
21  
22 135 consensus criteria based on WHO, National Cholesterol Education Program Adult Treatment  
23  
24 136 Panel III (NCEP ATP III) and ADA classifications (2,16–19).  
25  
26  
27

28 137 **Study selection:** Two reviewers will independently screen titles and abstracts from the  
29  
30 138 searches. Any disagreements will be resolved by discussion with a third (senior) reviewer.  
31  
32  
33 139 Articles of interest will be selected for a full-text assessment. If there is any doubt regarding  
34  
35 140 the eligibility of a study, the article will be selected for full-text assessment.  
36  
37  
38

39 141 Two reviewers will independently assess the full text articles. Disagreements between these  
40  
41  
42 142 reviewers will be resolved by discussion and where necessary, with a third (senior) reviewer,  
43  
44 143 to decide if the article is eligible for inclusion.  
45  
46  
47

48 144 A PRISMA flowchart of the selection process will be included in the systematic review (20).  
49  
50  
51

52 145 **Data collection process:** Two reviewers will independently extract data in duplicate using pre-  
53  
54 146 piloted forms. Data recorded will include: (i) date and country of study; (ii) study design; (iii)  
55  
56  
57 147 age, gender and ethnicity of participants; (iv) definition of retinopathy and method(s) used to  
58  
59 148 obtain images; (v) definition of pre-diabetes and method(s) used to make diagnosis; (vi) study  
60

1  
2  
3 149 groups and sizes; (vii) overall sample size and (viii) prevalence number and estimate. If  
4  
5  
6 150 present, secondary outcome data will also be recorded, including (i) definition and prevalence  
7  
8 151 of non-standard retinopathy features and (ii) definition and prevalence of maculopathy  
9  
10  
11 152 features. Where reported, prevalence estimates for co-morbid ocular pathology (e.g.  
12  
13 153 cataract) and cardiovascular risk factors (e.g. hypertension, metabolic syndrome) will also be  
14  
15 154 recorded.

16  
17  
18  
19 155 **Risk of bias assessment:** A modified critical appraisal tool for specifically assessing risk of bias  
20  
21 156 in prevalence studies will be used on selected articles (21). Quality assessment will be  
22  
23 157 undertaken by two reviewers independently. Disagreements will be resolved by discussion or  
24  
25 158 referral to a third (senior) reviewer. Judgements on the overall risk of bias will be categorised  
26  
27 159 as either low, moderate or high risk, based on the risk of bias of the 10 individual items listed  
28  
29 160 within the tool.

30  
31  
32  
33  
34  
35 161 **Data analysis:** Data will be analysed using purpose-built software for systematic reviews and  
36  
37 162 meta-analyses (Review Manager 5). Heterogeneity between included studies will be assessed  
38  
39 163 based on study design, populations and methods used to measure outcomes. Statistical  
40  
41 164 heterogeneity will be assessed using the  $I^2$  statistic and by visual inspection of forest plots.

42  
43  
44  
45  
46 165 Characteristics of included studies will be presented in summary tables and narrative text. In  
47  
48 166 expectation of prevalence varying between studies and populations, pooled prevalence  
49  
50 167 estimates for the pre-specified outcomes of interest will be calculated applying random  
51  
52 168 effects meta-analytic methods and reported in forest plots.  
53  
54  
55  
56  
57  
58  
59  
60

1  
2  
3 169 Where clinical and/or statistical heterogeneity is deemed too large by the reviewers (e.g.  $I^2 \geq$   
4  
5 170 90%), a systematic review without meta-analysis will be reported. Narrative synthesis will be  
6  
7  
8 171 conducted where quantitative data required for meta-analysis is lacking or absent.  
9

10  
11  
12 172 Depending on availability of data, subgroup analyses using the following covariates will also  
13  
14 173 be considered:

- 17 174 - WHO region or country
- 19 175 - Study period
- 22 176 - Age group (e.g. 18-30, 31-50, >50 years)
- 25 177 - Ethnicity (especially at-risk groups e.g. South Asian, African, Afro-Caribbean, Hispanic)
- 27 178 - Time since diagnosis of pre-diabetes (e.g. <1 year, 1-5 years, 6-10 years, >10 years)
- 29 179 - Grade of retinopathy as per ICDRSS classification
- 32 180 - Co-morbid ocular pathology (e.g. cataract)
- 34 181 - Co-morbid cardiovascular risk factors (e.g. hypertension, metabolic syndrome)
- 37 182 - Method used to diagnose pre-diabetes (e.g. OGTT)
- 39 183 - Method used to diagnose retinopathy (e.g. 7-field stereoscopic imaging)

43 184 If sufficient data are available, a sensitivity analysis will be performed excluding studies  
44  
45  
46 185 judged to be at high risk of bias.

#### 51 186 **PATIENT AND PUBLIC INVOLVEMENT:**

54 187 There were no time or funds allocated to patient and public involvement, particularly in the  
55  
56 188 context of the current coronavirus pandemic, so the reviewers were unable to involve  
57  
58  
59 189 patients. However, this systematic review asks an important clinical question and the protocol  
60

1  
2  
3 190 described follows a standardised approach as per PRISMA-P guidelines. People with pre-  
4  
5 191 diabetes will be invited to help the reviewers develop a strategy to disseminate the results.  
6  
7  
8  
9

10  
11 192 **ETHICS AND DISSEMINATION:**  
12

13  
14 193 This study is a systematic review using aggregated published data, without accessing any  
15  
16 194 personal identifiable information, hence there are no significant ethical or safety concerns.  
17  
18 195 The results of this study will be presented at international conferences and submitted for  
19  
20 196 publication in a peer-reviewed open-access journal. Authors will use their networks to  
21  
22 197 encourage broad dissemination of the results.  
23  
24  
25  
26  
27  
28

29 198 **REFERENCES:**  
30

- 31  
32 199 1. American Diabetes Association. Diagnosis and Classification of Diabetes Mellitus.  
33 200 Diabetes Care. 2010 Jan;33(Suppl 1):S62–9.  
34  
35 201 2. Alberti K, Zimmet P. Definition, diagnosis and classification of diabetes mellitus and its  
36 202 complications. Part 1: diagnosis and classification of diabetes mellitus provisional report  
37 203 of a WHO consultation. Diabet Med J Br Diabet Assoc. 1998 Jul;15(7):539–53.  
38  
39 204 3. International Diabetes Federation. International Diabetes Federation Atlas (9th Edition).  
40 205 2019 [cited 2020 May 1]; Available from: <https://www.diabetesatlas.org/>  
41  
42 206 4. Tabák AG, Jokela M, Akbaraly TN, Brunner EJ, Kivimäki M, Witte DR. Trajectories of  
43 207 glycaemia, insulin sensitivity, and insulin secretion before diagnosis of type 2 diabetes:  
44 208 an analysis from the Whitehall II study. Lancet Lond Engl. 2009 Jun 27;373(9682):2215–  
45 209 21.  
46  
47 210 5. Vistisen D, Witte DR, Brunner EJ, Kivimäki M, Tabák A, Jørgensen ME, et al. Risk of  
48 211 cardiovascular disease and death in individuals with prediabetes defined by different  
49 212 criteria: the Whitehall II study. Diabetes Care. 2018 Apr;41(4):899–906.  
50  
51 213 6. Tabák AG, Herder C, Rathmann W, Brunner EJ, Kivimäki M. Prediabetes: a high-risk state  
52 214 for diabetes development. The Lancet. 2012 Jun 16;379(9833):2279–90.  
53  
54 215 7. Lee CC, Perkins BA, Kayaniyil S, Harris SB, Retnakaran R, Gerstein HC, et al. Peripheral  
55 216 neuropathy and nerve dysfunction in individuals at high risk for type 2 diabetes: The  
56 217 PROMISE Cohort. Diabetes Care. 2015 May;38(5):793–800.

- 1  
2  
3 218 8. Azmi S, Ferdousi M, Petropoulos IN, Ponirakis G, Alam U, Fadavi H, et al. Corneal  
4 219 confocal microscopy identifies small-fiber neuropathy in subjects with impaired glucose  
5 220 tolerance who develop type 2 diabetes. *Diabetes Care*. 2015 Aug;38(8):1502–8.  
6  
7  
8 221 9. Brownrigg JRW, Hughes CO, Burleigh D, Karthikesalingam A, Patterson BO, Holt PJ, et al.  
9 222 Microvascular disease and risk of cardiovascular events among individuals with type 2  
10 223 diabetes: a population-level cohort study. *Lancet Diabetes Endocrinol*. 2016;4(7):588–  
11 224 97.  
12  
13  
14 225 10. Gong Q, Zhang P, Wang J, Ma J, An Y, Chen Y, et al. Morbidity and mortality after  
15 226 lifestyle intervention for people with impaired glucose tolerance: 30-year results of the  
16 227 Da Qing Diabetes Prevention Outcome Study. *Lancet Diabetes Endocrinol*. 2019  
17 228 Jun;7(6):452–61.  
18  
19  
20 229 11. Yau JWY, Rogers SL, Kawasaki R, Lamoureux EL, Kowalski JW, Bek T, et al. Global  
21 230 prevalence and major risk factors of diabetic retinopathy. *Diabetes Care*. 2012 Mar  
22 231 1;35(3):556–64.  
23  
24 232 12. Cheung N, Mitchell P, Wong TY. Diabetic retinopathy. *Lancet Lond Engl*. 2010 Jul  
25 233 10;376(9735):124–36.  
26  
27  
28 234 13. National Eye Institute. People with diabetes can prevent vision loss. 2019; Available  
29 235 from: [https://www.nei.nih.gov/sites/default/files/2019-06/diabetes-prevent-vision-](https://www.nei.nih.gov/sites/default/files/2019-06/diabetes-prevent-vision-loss.pdf)  
30 236 [loss.pdf](https://www.nei.nih.gov/sites/default/files/2019-06/diabetes-prevent-vision-loss.pdf)  
31  
32 237 14. McGowan J, Sampson M, Salzwedel DM, Cogo E, Foerster V, Lefebvre C. PRESS Peer  
33 238 Review of Electronic Search Strategies: 2015 guideline statement. *J Clin Epidemiol*.  
34 239 2016;75:40–6.  
35  
36  
37 240 15. Wilkinson CP, Ferris FL, Klein RE, Lee PP, Agardh CD, Davis M, et al. Proposed  
38 241 international clinical diabetic retinopathy and diabetic macular edema disease severity  
39 242 scales. *Ophthalmology*. 2003 Sep;110(9):1677–82.  
40  
41  
42 243 16. Alberti KGMM, Eckel RH, Grundy SM, Zimmet PZ, Cleeman JI, Donato KA, et al.  
43 244 Harmonizing the metabolic syndrome: a joint interim statement of the International  
44 245 Diabetes Federation Task Force on Epidemiology and Prevention; National Heart, Lung,  
45 246 and Blood Institute; American Heart Association; World Heart Federation; International  
46 247 Atherosclerosis Society; and International Association for the Study of Obesity.  
47 248 *Circulation*. 2009 Oct 20;120(16):1640–5.  
49  
50 249 17. American Diabetes Association. 2. Classification and Diagnosis of Diabetes: Standards of  
51 250 Medical Care in Diabetes-2018. *Diabetes Care*. 2018;41(Suppl 1):S13–27.  
52  
53  
54 251 18. National Cholesterol Education Program (NCEP) Expert Panel on Detection, Evaluation,  
55 252 and Treatment of High Blood Cholesterol in Adults (Adult Treatment Panel III). Third  
56 253 Report of the National Cholesterol Education Program (NCEP) Expert Panel on  
57 254 Detection, Evaluation, and Treatment of High Blood Cholesterol in Adults (Adult  
58 255 Treatment Panel III) final report. *Circulation*. 2002 Dec 17;106(25):3143–421.  
59  
60

- 1  
2  
3 256 19. Yumuk V, Tsigos C, Fried M, Schindler K, Busetto L, Micic D, et al. European Guidelines  
4 257 for Obesity Management in Adults. *Obes Facts*. 2015;8(6):402–24.
- 6 258 20. Moher D, Liberati A, Tetzlaff J, Altman DG, PRISMA Group. Preferred reporting items for  
7 259 systematic reviews and meta-analyses: the PRISMA statement. *PLoS Med*. 2009 Jul  
8 260 21;6(7):e1000097.
- 11 261 21. Hoy D, Brooks P, Woolf A, Blyth F, March L, Bain C, et al. Assessing risk of bias in  
12 262 prevalence studies: modification of an existing tool and evidence of interrater  
13 263 agreement. *J Clin Epidemiol*. 2012 Sep;65(9):934–9.

16  
17  
18  
19 264 **AUTHORS' CONTRIBUTIONS:**

20  
21 265 VK, UA and TLJ conceived the review topic. VK performed background exploratory searches  
22 266 and drafted the initial search strategy. VK, JE and PN co-wrote the initial protocol. UA, SN,  
23 267 RAM and TLJ provided critical appraisal and senior oversight of the protocol.

24  
25  
26  
27  
28  
29  
30 268 For the systematic review, VK and PN will perform the searches, data extraction and analysis.  
31 269 JE will provide oversight of the searches, data analysis and extraction. SN will provide  
32 270 statistical input for data analysis. UA, RAM and TLJ will provide critical appraisal and senior  
33 271 oversight of the final manuscript.

34  
35  
36  
37  
38  
39  
40  
41  
42  
43 272 **FUNDING STATEMENT:**

44  
45  
46 273 This research received no specific grant from any funding agency in the public, commercial or  
47 274 not-for-profit sectors.

48  
49  
50  
51  
52  
53 275 **COMPETING INTERESTS STATEMENT:**

54 276 The authors have no competing interests to declare.  
55  
56  
57  
58  
59  
60

1  
2  
3 277 **KEY WORDS:**  
4

5  
6 278 Pre-diabetes, retinopathy, systematic review, humans.  
7  
8  
9

10  
11 279 **WORD COUNT:**  
12

13  
14 280 2,288 (excluding references and appendices)  
15  
16  
17  
18  
19  
20  
21  
22  
23  
24  
25  
26  
27  
28  
29  
30  
31  
32  
33  
34  
35  
36  
37  
38  
39  
40  
41  
42  
43  
44  
45  
46  
47  
48  
49  
50  
51  
52  
53  
54  
55  
56  
57  
58  
59  
60

For peer review only



**APPENDIX 1 – LIST OF ABBREVIATIONS:**

|              |                                                                             |
|--------------|-----------------------------------------------------------------------------|
| ADA          | American Diabetes Association                                               |
| CINAHL       | Cumulative Index to Nursing and Allied Health Literature                    |
| DR           | Diabetic Retinopathy                                                        |
| DMO          | Diabetic Macular Oedema                                                     |
| ICDRSS       | International Clinical Diabetic Retinopathy Severity Scale                  |
| IFG          | Impaired Fasting Glucose                                                    |
| IGT          | Impaired Glucose Tolerance                                                  |
| IRMA         | Intra-Retinal Microvascular Abnormalities                                   |
| NCEP ATP III | National Cholesterol Education Program Adult Treatment Panel III            |
| NSC          | National Screening Committee (United Kingdom)                               |
| NVD          | New Vessels at the Disc                                                     |
| NVE          | New Vessels Elsewhere                                                       |
| OGTT         | Oral Glucose Tolerance Test                                                 |
| PRESS        | Peer Review of Electronic Search Strategies                                 |
| PRISMA-P     | Preferred Reporting Items for Systematic Review and Meta-Analysis Protocols |
| PDR          | Proliferative Diabetic Retinopathy                                          |
| VTDR         | Vision-Threatening Diabetic Retinopathy                                     |
| WHO          | World Health Organisation                                                   |

**APPENDIX 3 – DRAFT MEDLINE SEARCH STRATEGY:**

1. exp Prevalence/
2. exp Incidence/
3. exp Epidemiology/
4. exp Epidemiologic Methods/
5. exp Population Characteristics/
6. (prevalen\* or occur\* or inciden\* or burden or epidemiolog\* or frequenc\* or rate).tw
7. Or/1-6
8. exp Glucose Intolerance/
9. exp Prediabetic State/
10. exp Hyperglycemia/
11. exp Glycated Hemoglobin A/
12. glucose intolerance.tw
13. (prediabet\* or pre-diabet\* or pre diabet\* or borderline diabet\*).tw
14. hyperglyc?emi\*.tw
15. ((impaired fasting adj2 glucose) or IFG or impaired FPG).tw
16. ((impaired glucose adj (tolerance or metabolism)) or IGT).tw
17. Or/8-16
18. exp Diabetic Retinopathy/
19. exp Retina/
20. microvasc\* adj2 (change\* or disease\* or dysfuncti\* or complicat\*).tw
21. (retinopathy or retinal).tw
22. Or/18-21
23. 7 and 17 and 22

1  
2  
3  
4  
5  
6  
7  
8  
9  
10  
11  
12  
13  
14  
15  
16  
17  
18  
19  
20  
21  
22  
23  
24  
25  
26  
27  
28  
29  
30  
31  
32  
33  
34  
35  
36  
37  
38  
39  
40  
41  
42  
43  
44  
45  
46  
47  
48  
49  
50  
51  
52  
53  
54  
55  
56  
57  
58  
59  
60

24. exp animals/ not humans.sh

25. 23 not 24

26. ...dedup 25

For peer review only

## APPENDIX 2 – PRISMA-P 2015 CHECKLIST

This checklist has been adapted for use with systematic review protocol submissions to BioMed Central journals from Table 3 in Moher D et al: Preferred reporting items for systematic review and meta-analysis protocols (PRISMA-P) 2015 statement. *Systematic Reviews* 2015 4:1

An Editorial from the Editors-in-Chief of *Systematic Reviews* details why this checklist was adapted - Moher D, Stewart L & Shekelle P: Implementing PRISMA-P: recommendations for prospective authors. *Systematic Reviews* 2016 5:15

| Section/topic                     | #  | Checklist item                                                                                                                                                                                  | Information reported                |                          | Line number(s) |
|-----------------------------------|----|-------------------------------------------------------------------------------------------------------------------------------------------------------------------------------------------------|-------------------------------------|--------------------------|----------------|
|                                   |    |                                                                                                                                                                                                 | Yes                                 | No                       |                |
| <b>ADMINISTRATIVE INFORMATION</b> |    |                                                                                                                                                                                                 |                                     |                          |                |
| <b>Title</b>                      |    |                                                                                                                                                                                                 |                                     |                          |                |
| Identification                    | 1a | Identify the report as a protocol of a systematic review                                                                                                                                        | <input checked="" type="checkbox"/> | <input type="checkbox"/> | 2              |
| Update                            | 1b | If the protocol is for an update of a previous systematic review, identify as such                                                                                                              | <input type="checkbox"/>            | <input type="checkbox"/> | N/A            |
| <b>Registration</b>               | 2  | If registered, provide the name of the registry (e.g., PROSPERO) and registration number in the Abstract                                                                                        | <input type="checkbox"/>            | <input type="checkbox"/> | N/A            |
| <b>Authors</b>                    |    |                                                                                                                                                                                                 |                                     |                          |                |
| Contact                           | 3a | Provide name, institutional affiliation, and e-mail address of all protocol authors; provide physical mailing address of corresponding author                                                   | <input checked="" type="checkbox"/> | <input type="checkbox"/> | 3-16           |
| Contributions                     | 3b | Describe contributions of protocol authors and identify the guarantor of the review                                                                                                             | <input checked="" type="checkbox"/> | <input type="checkbox"/> | 264-271        |
| <b>Amendments</b>                 | 4  | If the protocol represents an amendment of a previously completed or published protocol, identify as such and list changes; otherwise, state plan for documenting important protocol amendments | <input checked="" type="checkbox"/> | <input type="checkbox"/> | 46-47          |
| <b>Support</b>                    |    |                                                                                                                                                                                                 |                                     |                          |                |
| Sources                           | 5a | Indicate sources of financial or other support for the review                                                                                                                                   | <input checked="" type="checkbox"/> | <input type="checkbox"/> |                |
| Sponsor                           | 5b | Provide name for the review funder and/or sponsor                                                                                                                                               | <input type="checkbox"/>            | <input type="checkbox"/> | N/A            |
| Role of sponsor/funder            | 5c | Describe roles of funder(s), sponsor(s), and/or institution(s), if any, in developing the protocol                                                                                              | <input type="checkbox"/>            | <input type="checkbox"/> | N/A            |
| <b>INTRODUCTION</b>               |    |                                                                                                                                                                                                 |                                     |                          |                |
| <b>Rationale</b>                  | 6  | Describe the rationale for the review in the context of what is already known                                                                                                                   | <input checked="" type="checkbox"/> | <input type="checkbox"/> | 56-87          |

| Section/topic                             | #   | Checklist item                                                                                                                                                                                                                              | Information reported                |                          | Line number(s) |
|-------------------------------------------|-----|---------------------------------------------------------------------------------------------------------------------------------------------------------------------------------------------------------------------------------------------|-------------------------------------|--------------------------|----------------|
|                                           |     |                                                                                                                                                                                                                                             | Yes                                 | No                       |                |
| <b>Objectives</b>                         | 7   | Provide an explicit statement of the question(s) the review will address with reference to participants, interventions, comparators, and outcomes (PICO)                                                                                    | <input checked="" type="checkbox"/> | <input type="checkbox"/> | 86-87          |
| <b>METHODS</b>                            |     |                                                                                                                                                                                                                                             |                                     |                          |                |
| <b>Eligibility criteria</b>               | 8   | Specify the study characteristics (e.g., PICO, study design, setting, time frame) and report characteristics (e.g., years considered, language, publication status) to be used as criteria for eligibility for the review                   | <input checked="" type="checkbox"/> | <input type="checkbox"/> | 101-113        |
| <b>Information sources</b>                | 9   | Describe all intended information sources (e.g., electronic databases, contact with study authors, trial registers, or other grey literature sources) with planned dates of coverage                                                        | <input checked="" type="checkbox"/> | <input type="checkbox"/> | 88-100         |
| <b>Search strategy</b>                    | 10  | Present draft of search strategy to be used for at least one electronic database, including planned limits, such that it could be repeated                                                                                                  | <input checked="" type="checkbox"/> | <input type="checkbox"/> | 92-95          |
| <b>STUDY RECORDS</b>                      |     |                                                                                                                                                                                                                                             |                                     |                          |                |
| Data management                           | 11a | Describe the mechanism(s) that will be used to manage records and data throughout the review                                                                                                                                                | <input checked="" type="checkbox"/> | <input type="checkbox"/> | 161-164        |
| Selection process                         | 11b | State the process that will be used for selecting studies (e.g., two independent reviewers) through each phase of the review (i.e., screening, eligibility, and inclusion in meta-analysis)                                                 | <input checked="" type="checkbox"/> | <input type="checkbox"/> | 137-144        |
| Data collection process                   | 11c | Describe planned method of extracting data from reports (e.g., piloting forms, done independently, in duplicate), any processes for obtaining and confirming data from investigators                                                        | <input checked="" type="checkbox"/> | <input type="checkbox"/> | 145-146        |
| <b>Data items</b>                         | 12  | List and define all variables for which data will be sought (e.g., PICO items, funding sources), any pre-planned data assumptions and simplifications                                                                                       | <input checked="" type="checkbox"/> | <input type="checkbox"/> | 146-154        |
| <b>Outcomes and prioritization</b>        | 13  | List and define all outcomes for which data will be sought, including prioritization of main and additional outcomes, with rationale                                                                                                        | <input checked="" type="checkbox"/> | <input type="checkbox"/> | 114-136        |
| <b>Risk of bias in individual studies</b> | 14  | Describe anticipated methods for assessing risk of bias of individual studies, including whether this will be done at the outcome or study level, or both; state how this information will be used in data synthesis                        | <input checked="" type="checkbox"/> | <input type="checkbox"/> | 155-160        |
| <b>DATA</b>                               |     |                                                                                                                                                                                                                                             |                                     |                          |                |
| <b>Synthesis</b>                          | 15a | Describe criteria under which study data will be quantitatively synthesized                                                                                                                                                                 | <input checked="" type="checkbox"/> | <input type="checkbox"/> | 161-168        |
|                                           | 15b | If data are appropriate for quantitative synthesis, describe planned summary measures, methods of handling data, and methods of combining data from studies, including any planned exploration of consistency (e.g., $I^2$ , Kendall's tau) | <input checked="" type="checkbox"/> | <input type="checkbox"/> | 169-171        |

| Section/topic                            | #   | Checklist item                                                                                                              | Information reported                |                          | Line number(s) |
|------------------------------------------|-----|-----------------------------------------------------------------------------------------------------------------------------|-------------------------------------|--------------------------|----------------|
|                                          |     |                                                                                                                             | Yes                                 | No                       |                |
|                                          | 15c | Describe any proposed additional analyses (e.g., sensitivity or subgroup analyses, meta-regression)                         | <input checked="" type="checkbox"/> | <input type="checkbox"/> | 172-185        |
|                                          | 15d | If quantitative synthesis is not appropriate, describe the type of summary planned                                          | <input checked="" type="checkbox"/> | <input type="checkbox"/> | 169-171        |
| <b>Meta-bias(es)</b>                     | 16  | Specify any planned assessment of meta-bias(es) (e.g., publication bias across studies, selective reporting within studies) | <input checked="" type="checkbox"/> | <input type="checkbox"/> | 184-185        |
| <b>Confidence in cumulative evidence</b> | 17  | Describe how the strength of the body of evidence will be assessed (e.g., GRADE)                                            | <input type="checkbox"/>            | <input type="checkbox"/> | N/A            |

# BMJ Open

## Prevalence of retinopathy in pre-diabetes: protocol for a systematic review and meta-analysis

|                                 |                                                                                                                                                                                                                                                                                                                                                                                                                                                                                                                                                                                                                                                           |
|---------------------------------|-----------------------------------------------------------------------------------------------------------------------------------------------------------------------------------------------------------------------------------------------------------------------------------------------------------------------------------------------------------------------------------------------------------------------------------------------------------------------------------------------------------------------------------------------------------------------------------------------------------------------------------------------------------|
| Journal:                        | <i>BMJ Open</i>                                                                                                                                                                                                                                                                                                                                                                                                                                                                                                                                                                                                                                           |
| Manuscript ID                   | bmjopen-2020-040997.R1                                                                                                                                                                                                                                                                                                                                                                                                                                                                                                                                                                                                                                    |
| Article Type:                   | Protocol                                                                                                                                                                                                                                                                                                                                                                                                                                                                                                                                                                                                                                                  |
| Date Submitted by the Author:   | 08-Aug-2020                                                                                                                                                                                                                                                                                                                                                                                                                                                                                                                                                                                                                                               |
| Complete List of Authors:       | Kirthi, Varo; King's College London Faculty of Life Sciences and Medicine, Ophthalmology Research Office<br>Nderitu, Paul; King's College Hospital NHS Foundation Trust, Ophthalmology<br>Alam, Uazman; University of Liverpool Institute of Ageing and Chronic Disease, Diabetes and Endocrinology Research<br>Evans, Jennifer; London School of Hygiene and Tropical Medicine, International Centre for Eye Health<br>Nevitt, Sarah; University of Liverpool, Department of Biostatistics<br>Malik, Rayaz A. ; Weill Cornell Medicine-Qatar, Medicine<br>Jackson, Timothy; King's College London, Ophthalmology; King's College Hospital, Ophthalmology |
| <b>Primary Subject Heading</b>: | Diabetes and endocrinology                                                                                                                                                                                                                                                                                                                                                                                                                                                                                                                                                                                                                                |
| Secondary Subject Heading:      | Ophthalmology, Epidemiology                                                                                                                                                                                                                                                                                                                                                                                                                                                                                                                                                                                                                               |
| Keywords:                       | Diabetic retinopathy < DIABETES & ENDOCRINOLOGY, General diabetes < DIABETES & ENDOCRINOLOGY, Medical retina < OPHTHALMOLOGY, EPIDEMIOLOGY                                                                                                                                                                                                                                                                                                                                                                                                                                                                                                                |
|                                 |                                                                                                                                                                                                                                                                                                                                                                                                                                                                                                                                                                                                                                                           |

SCHOLARONE™  
Manuscripts



I, the Submitting Author has the right to grant and does grant on behalf of all authors of the Work (as defined in the below author licence), an exclusive licence and/or a non-exclusive licence for contributions from authors who are: i) UK Crown employees; ii) where BMJ has agreed a CC-BY licence shall apply, and/or iii) in accordance with the terms applicable for US Federal Government officers or employees acting as part of their official duties; on a worldwide, perpetual, irrevocable, royalty-free basis to BMJ Publishing Group Ltd ("BMJ") its licensees and where the relevant Journal is co-owned by BMJ to the co-owners of the Journal, to publish the Work in this journal and any other BMJ products and to exploit all rights, as set out in our [licence](#).

The Submitting Author accepts and understands that any supply made under these terms is made by BMJ to the Submitting Author unless you are acting as an employee on behalf of your employer or a postgraduate student of an affiliated institution which is paying any applicable article publishing charge ("APC") for Open Access articles. Where the Submitting Author wishes to make the Work available on an Open Access basis (and intends to pay the relevant APC), the terms of reuse of such Open Access shall be governed by a Creative Commons licence – details of these licences and which [Creative Commons](#) licence will apply to this Work are set out in our licence referred to above.

Other than as permitted in any relevant BMJ Author's Self Archiving Policies, I confirm this Work has not been accepted for publication elsewhere, is not being considered for publication elsewhere and does not duplicate material already published. I confirm all authors consent to publication of this Work and authorise the granting of this licence.



1  
2  
3 **1 TITLE:**  
4

5  
6 **2** Prevalence of retinopathy in pre-diabetes: protocol for a systematic review and meta-analysis  
7  
8  
9

10  
11 **3 AUTHORS:**  
12

13  
14 **4** Varo Kirthi <sup>1,2</sup> [v.kirthi@nhs.net](mailto:v.kirthi@nhs.net)  
15

16 **5** Paul Nderitu <sup>2</sup> [paulnderitu@nhs.net](mailto:paulnderitu@nhs.net)  
17

18 **6** Uazman Alam <sup>3,4</sup> [uazman.alam@liverpool.ac.uk](mailto:uazman.alam@liverpool.ac.uk)  
19

20 **7** Jennifer Evans <sup>5</sup> [jennifer.evans@lshtm.ac.uk](mailto:jennifer.evans@lshtm.ac.uk)  
21

22 **8** Sarah Nevitt <sup>3</sup> [sarah.nevitt@liverpool.ac.uk](mailto:sarah.nevitt@liverpool.ac.uk)  
23

24 **9** Rayaz A Malik <sup>6</sup> [ram2045@qatar-med.cornell.edu](mailto:ram2045@qatar-med.cornell.edu)  
25

26 **10** Timothy L Jackson <sup>1,2</sup> [t.jackson1@nhs.net](mailto:t.jackson1@nhs.net)  
27  
28

29  
30  
31  
32 **11 Institutional affiliations:** <sup>1</sup> King's College London; <sup>2</sup> King's College Hospital NHS Foundation  
33 Trust; <sup>3</sup> University of Liverpool; <sup>4</sup> Liverpool University Hospitals NHS Foundation Trust; <sup>5</sup>  
34 London School of Hygiene and Tropical Medicine; <sup>6</sup> Weill Cornell Medicine-Qatar  
35  
36  
37  
38  
39

40  
41 **14 Address for correspondence:** Dr Varo Kirthi, Faculty of Life Sciences and Medicine, King's  
42 College London, Ophthalmology Research Office, Normanby Building, King's College Hospital,  
43 London SE5 9RS  
44  
45  
46  
47  
48  
49

50  
51 **17 ABSTRACT:**  
52

53  
54 **18 Introduction:** There is growing evidence of a higher than expected prevalence of retinopathy  
55 in pre-diabetes. This paper presents the protocol of a systematic review and meta-analysis of  
56  
57  
58  
59  
60

1  
2  
3 20 retinopathy in pre-diabetes. The aim of the review is to estimate the prevalence of  
4  
5  
6 21 retinopathy in pre-diabetes and to summarise the current data.  
7  
8  
9

10 22 **Methods and analysis:** This protocol is developed in accordance with the Preferred Reporting  
11  
12 23 Items for Systematic Reviews and Meta-Analysis Protocols (PRISMA-P) guidelines. A  
13  
14 24 comprehensive electronic bibliographic search will be conducted in MEDLINE, EMBASE, Web  
15  
16  
17 25 of Science, CINAHL (Cumulative Index to Nursing and Allied Health Literature), Google Scholar  
18  
19 26 and the Cochrane Library. Eligible studies will report prevalence data for retinopathy on  
20  
21  
22 27 fundus photography in adults with pre-diabetes. No time restrictions will be placed on the  
23  
24 28 date of publication. Screening for eligible studies and data extraction will be conducted by  
25  
26 29 two reviewers independently, using defined inclusion criteria and pre-piloted data extraction  
27  
28  
29 30 forms. Disagreements between the reviewers will be resolved by discussion, and if required,  
30  
31 31 a third (senior) reviewer will arbitrate.  
32  
33  
34

35 32 The primary outcome is the prevalence of any standard features of diabetic retinopathy on  
36  
37 33 fundus photography, as per International Clinical Diabetic Retinopathy Severity Scale (ICDRSS)  
38  
39 34 classification. Secondary outcomes are the prevalence of: (i) any retinal microvascular  
40  
41 35 abnormalities on fundus photography that are not standard features of diabetic retinopathy  
42  
43 36 as per ICDRSS classification and (ii) any macular microvascular abnormalities on fundus  
44  
45 37 photography, including but not limited to the presence of macular exudates, microaneurysms  
46  
47 38 and haemorrhages. Risk of bias for included studies will be assessed using a validated risk of  
48  
49 39 bias tool for prevalence studies. Pooled estimates for the pre-specified outcomes of interest  
50  
51 40 will be calculated using random effects meta-analytic techniques. Heterogeneity will be  
52  
53 41 assessed using the  $I^2$  statistic.  
54  
55  
56  
57  
58  
59  
60

1  
2  
3 42 **Ethics and dissemination:** Ethical approval is not required as this is a protocol for a systematic  
4  
5  
6 43 review and no primary data are to be collected. Findings will be disseminated through peer-  
7  
8 44 reviewed publications and presentations at national and international meetings including  
9  
10 45 Diabetes UK, European Association for the Study of Diabetes, American Diabetes Association  
11  
12  
13 46 and International Diabetes Federation conferences.

14  
15  
16  
17 47 **Registration details:** This review has been registered on PROSPERO (ID: CRD42020184820).  
18  
19 48 Any protocol amendments will be updated on the PROSPERO database.  
20  
21  
22  
23  
24

#### 25 49 **STRENGTHS AND LIMITATIONS OF THIS STUDY:**

- 26  
27 50 • This systematic review protocol follows the Preferred Reporting Items for Systematic  
28  
29 Review and Meta-Analysis Protocols (PRISMA-P) guidelines.  
30  
31 51  
32 52 • This systematic review addresses an important gap in the current evidence by  
33  
34 estimating the prevalence of retinopathy in pre-diabetes.  
35  
36 53  
37 54 • There is potential for significant clinical and statistical heterogeneity in reporting of  
38  
39 prevalence data between different populations.  
40  
41  
42  
43  
44

#### 45 56 **BACKGROUND:**

46  
47  
48 57 Pre-diabetes is defined by blood glucose levels above the normal range, but below the  
49  
50 58 threshold for type 2 diabetes mellitus (1,2). The burden of prediabetes is enormous: it is  
51  
52  
53 59 currently estimated to affect 373 million people across the globe and this number is projected  
54  
55 60 to increase to 587 million (8.3% of the global adult population) by 2045 (3).  
56  
57  
58  
59  
60

1  
2  
3 61 Cohort analysis of people with pre-diabetes reveals an increased incidence of microvascular  
4  
5 62 and macrovascular disease, including an elevated all-cause mortality, compared to people  
6  
7  
8 63 with normal glucose metabolism (4,5). This suggests that end-organ complications of  
9  
10 64 hyperglycaemia may be occurring prior to the onset of overt diabetes (6). Furthermore,  
11  
12  
13 65 people with prediabetes and microvascular disease are more likely to develop overt diabetes  
14  
15 66 (7,8). In a population-based analysis of 49,072 participants with diabetes, the presence of  
16  
17 67 diabetic retinopathy (DR) was associated with an increased risk (hazard ratio 1.39, 95%  
18  
19 68 confidence interval 1.09-1.76) of cardiovascular death, non-fatal myocardial infarction or  
20  
21 69 stroke, after adjustment of traditional risk factors including HbA1c, lipid profile and blood  
22  
23 70 pressure (9). Despite ongoing debate on how best to identify people with pre-diabetes at high  
24  
25 71 risk of end-organ complications, long-term data show a reduction in both morbidity and  
26  
27 72 mortality following early lifestyle interventions (10).

28  
29  
30  
31  
32  
33 73 A systematic review of 35 population-based studies of people with diabetes reported the  
34  
35 74 prevalence of DR, proliferative diabetic retinopathy (PDR), diabetic macular oedema (DMO)  
36  
37 75 and vision-threatening diabetic retinopathy (VTDR) as 34.6%, 7.0%, 6.8% and 10.2%,  
38  
39 76 respectively (11). The early onset of retinopathy in pre-diabetes is of particular concern as DR  
40  
41 77 remains one of the principal causes of vision loss in adults of working age in developed  
42  
43 78 countries, with considerable health and socioeconomic consequences (12). Given projections  
44  
45 79 that up to 70% of people with pre-diabetes may eventually develop diabetes during their  
46  
47 80 lifespan, early identification of retinopathy is a significant health priority (6). It is estimated  
48  
49 81 that up to 95% of vision loss in diabetes is preventable or treatable, if detected early (13).

50  
51  
52  
53 82 Previous studies have suggested that isolated retinopathy changes occur in 5-10% of the  
54  
55 83 general population and in 2.6-8.6% in those without diabetes or hypertension (14,15).

1  
2  
3 84 Although several studies have reported retinopathy changes in pre-diabetes, there has been  
4  
5 85 no systematic review or meta-analysis of the literature to estimate an overall prevalence.  
6  
7  
8 86 Understanding the prevalence of retinopathy may not only focus attention on early  
9  
10 87 interventions but may also help refine diagnostic criteria and risk stratification for pre-  
11  
12  
13 88 diabetes. The aim of this systematic review is to estimate the prevalence of retinopathy  
14  
15 89 detected on fundus photography in adults with pre-diabetes.  
16  
17  
18  
19  
20

## 21 90 **METHODS AND ANALYSIS:**

22  
23 91 **Study design:** Comprehensive literature searches of electronic bibliographic databases will be  
24  
25  
26 92 conducted in MEDLINE (access via OVID), EMBASE (access via OVID), Web of Science, CINAHL  
27  
28 93 (Cumulative Index to Nursing and Allied Health Literature), Google Scholar and the Cochrane  
29  
30  
31 94 Library. No time restrictions will be placed on the date of publication. All search strategies will  
32  
33 95 be independently reviewed by an expert information specialist using the Peer Review of  
34  
35 96 Electronic Search Strategies (PRESS) checklist and a draft MEDLINE search strategy is included  
36  
37 97 in Appendix 1 (16). Additional articles will be identified by searching the references of  
38  
39 98 included studies and other review articles identified during the course of the searches. Results  
40  
41 99 from the database searches will be merged using an electronic reference manager to facilitate  
42  
43 100 removal of duplicates. Trial registries such as ClinicalTrials.gov will be consulted to track  
44  
45  
46 101 studies that may not have been indexed in the databases. Relevant publications will be  
47  
48  
49 102 retrieved manually if electronic access is not available.  
50  
51  
52  
53

54 103 **Participants, eligibility and setting:** Inclusion criteria will be adults over 18 years of age who  
55  
56 104 have pre-diabetes defined by American Diabetes Association (ADA) criteria (1). This includes  
57  
58 105 impaired fasting glucose (IFG) and impaired glucose tolerance (IGT) as subgroups of pre-  
59  
60

1  
2  
3 106 diabetes. Population-based cohort or cross-sectional studies from any country in any setting  
4  
5  
6 107 will be considered, provided they have been reported in English. Studies must report  
7  
8 108 prevalence data for retinopathy detected on fundus photography, using any accepted  
9  
10 109 method (e.g. 1-, 2-, 3- or 7-field dilated stereoscopic colour fundus photography) at least once  
11  
12  
13 110 in the study population. A lack of detail on the method used or quality of images taken will be  
14  
15 111 documented but will not be considered an exclusion criterion. Studies that report other  
16  
17 112 methods of imaging, such as fluorescein angiography or optical coherence tomography, will  
18  
19  
20 113 be included only if fundus photography data are also provided. Use of alternative diagnostic  
21  
22 114 criteria for pre-diabetes, such as World Health Organization (WHO) criteria, will be recorded  
23  
24 115 and prevalence figures reported separately, but will not be considered a reason for exclusion  
25  
26  
27 116 (2). A lack of reporting of the definition of pre-diabetes and/or retinopathy will be  
28  
29  
30 117 documented but will not be considered a reason for exclusion.

31  
32  
33  
34 118 **Outcomes:** The primary outcome is the prevalence of any standard features of diabetic  
35  
36 119 retinopathy on fundus photography, as per International Clinical Diabetic Retinopathy  
37  
38 120 Severity Scale (ICDRSS) classification (17). This will be defined by the presence of any of the  
39  
40  
41 121 following features:

- 42  
43  
44  
45 122 (i) Microaneurysms  
46  
47 123 (ii) Intraretinal haemorrhages  
48  
49 124 (iii) Hard exudates  
50  
51 125 (iv) Cotton-wool spots  
52  
53 126 (v) Venous beading  
54  
55 127 (vi) Intraretinal microvascular abnormalities (IRMAs)  
56  
57 128 (vii) New vessels at the optic disc (NVD) or elsewhere (NVE)  
58  
59  
60

1  
2  
3 129 (viii) Vitreous or pre-retinal haemorrhage  
4  
5  
6

7 130 Secondary outcomes are the prevalence of: (i) any retinal microvascular abnormalities on  
8  
9 131 fundus photography that are not standard features of diabetic retinopathy as per ICDRSS  
10  
11 132 classification and (ii) any macular microvascular abnormalities on fundus photography,  
12  
13 133 including but not limited to the presence of macular exudates, microaneurysms or  
14  
15 134 haemorrhages.  
16  
17  
18

19  
20  
21 135 If available, data on glycaemic parameters such as fasting glucose, two-hour oral glucose  
22  
23 136 tolerance test (OGTT) and HbA1c will be extracted. Similarly, if reported, prevalence data on  
24  
25 137 cardiovascular parameters such as systolic and diastolic blood pressure, lipid profile and  
26  
27 138 metabolic syndrome will also be extracted. Metabolic syndrome will be defined as per  
28  
29 139 consensus criteria based on WHO, National Cholesterol Education Program Adult Treatment  
30  
31 140 Panel III (NCEP ATP III) and ADA classifications (2,18–21).  
32  
33  
34  
35  
36

37 141 **Study selection:** Two reviewers will independently screen titles and abstracts from the  
38  
39 142 searches and exclude any that clearly do not satisfy the inclusion criteria. Any disagreements  
40  
41 143 will be resolved by discussion, and if required, a third (senior) reviewer will arbitrate. Articles  
42  
43 144 of interest will be selected for a full-text assessment. If there is any doubt regarding the  
44  
45 145 eligibility of a study, the article will be selected for full-text assessment.  
46  
47  
48  
49

50 146 Two reviewers will independently assess the full text articles against the eligibility criteria.  
51  
52 147 Disagreements between these reviewers will be resolved by discussion, and if required, a  
53  
54 148 third (senior) reviewer will arbitrate.  
55  
56  
57

58  
59 149 A PRISMA flowchart of the selection process will be included in the systematic review (22).  
60

1  
2  
3 150 **Data collection process:** Two reviewers will independently extract data in duplicate using pre-  
4  
5  
6 151 piloted forms. Data recorded will include: (i) date and country of study; (ii) study design; (iii)  
7  
8 152 age, gender and ethnicity of participants; (iv) definition of retinopathy and method(s) used to  
9  
10 153 obtain images; (v) definition of pre-diabetes and method(s) used to make diagnosis; (vi) study  
11  
12  
13 154 groups and sizes; (vii) overall sample size and (viii) prevalence number and estimate. If  
14  
15 155 present, secondary outcome data will also be recorded, including (i) definition and prevalence  
16  
17  
18 156 of non-standard retinopathy features and (ii) definition and prevalence of maculopathy  
19  
20 157 features. Where reported, prevalence estimates for co-morbid ocular pathology (e.g.  
21  
22  
23 158 cataract) and cardiovascular risk factors (e.g. hypertension, metabolic syndrome) will also be  
24  
25 159 recorded.

26  
27  
28  
29 160 **Risk of bias assessment:** A modified critical appraisal tool for specifically assessing risk of bias  
30  
31 161 in prevalence studies will be used on selected articles and is included in Appendix 2 (23). The  
32  
33  
34 162 tool includes 9 questions, each scoring 0 or 1, to determine confounding, selection bias, and  
35  
36 163 bias related to measurement and data analysis. Overall risk of bias will be determined by the  
37  
38  
39 164 total score for each article: 0-3 considered low risk, 4-6 considered moderate risk and  $\geq 7$   
40  
41 165 considered high risk. Quality assessment will be undertaken by two reviewers independently.  
42  
43  
44 166 Disagreements will be resolved by discussion, and if required, a third (senior) reviewer will  
45  
46 167 arbitrate. Judgements on the overall risk of bias will be categorised as either low, moderate  
47  
48  
49 168 or high risk, based on the risk of bias of the 10 individual items listed within the tool.

50  
51  
52 169 **Data analysis:** Data will be analysed using purpose-built software for systematic reviews and  
53  
54  
55 170 meta-analyses (Review Manager 5). Heterogeneity between included studies will be assessed  
56  
57  
58 171 based on study design, populations and methods used to measure outcomes. Statistical  
59  
60 172 heterogeneity will be assessed using the  $I^2$  statistic and by visual inspection of forest plots.



1  
2  
3 173 Characteristics of included studies will be presented in summary tables and narrative text. In  
4  
5  
6 174 expectation of prevalence varying between studies and populations, pooled prevalence  
7  
8 175 estimates for the pre-specified outcomes of interest will be calculated applying random  
9  
10 176 effects meta-analytic methods and reported in forest plots.

11  
12  
13  
14 177 Where clinical and/or statistical heterogeneity is deemed too large by the reviewers (e.g.  $I^2 \geq$   
15  
16 178 90%), a systematic review without meta-analysis will be reported. Narrative synthesis will be  
17  
18 179 conducted where quantitative data required for meta-analysis is lacking or absent.

19  
20  
21  
22  
23 180 Depending on availability of data, subgroup analyses using the following covariates will also  
24  
25 181 be considered:

- 26  
27  
28 182 - WHO region or country
- 29  
30 183 - Study period
- 31  
32 184 - Age group (e.g. 18-30, 31-50, >50 years)
- 33  
34 185 - Ethnicity (especially at-risk groups e.g. South Asian, African, Afro-Caribbean, Hispanic)
- 35  
36 186 - Time since diagnosis of pre-diabetes (e.g. <1 year, 1-5 years, 6-10 years, >10 years)
- 37  
38 187 - Subtype of pre-diabetes (e.g. IFG compared to IGT)
- 39  
40 188 - Grade of retinopathy as per ICDRSS classification
- 41  
42 189 - Co-morbid ocular pathology (e.g. cataract)
- 43  
44 190 - Co-morbid cardiovascular risk factors (e.g. hypertension, metabolic syndrome)
- 45  
46 191 - Method or criteria used to diagnose pre-diabetes (e.g. WHO)
- 47  
48 192 - Method used to diagnose retinopathy (e.g. 7-field stereoscopic imaging)
- 49  
50  
51  
52

53  
54  
55  
56  
57 193 If sufficient data are available, a sensitivity analysis will be performed excluding studies  
58  
59 194 judged to be at high risk of bias.

1  
2  
3 195 **Grading of evidence:** Certainty of the evidence will be assessed using the GRADE approach  
4  
5  
6 196 (24,25). Specifically, prevalence studies will be considered to constitute high certainty  
7  
8 197 evidence to answer this review question, and downgraded for risk of bias, imprecision,  
9  
10 198 inconsistency, indirectness and publication bias. Two reviewers will independently make this  
11  
12  
13 199 judgement. Disagreements will be resolved by discussion, and if required, a third (senior)  
14  
15 200 reviewer will arbitrate.  
16  
17  
18  
19  
20

21 **PATIENT AND PUBLIC INVOLVEMENT:**  
22

23 202 There were no time or funds allocated to patient and public involvement, particularly in the  
24  
25  
26 203 context of the current coronavirus pandemic, so the reviewers were unable to involve  
27  
28 204 patients. However, this systematic review asks an important clinical question and the protocol  
29  
30  
31 205 described follows a standardised approach as per PRISMA-P guidelines. People with pre-  
32  
33 206 diabetes will be invited to help the reviewers develop a strategy to disseminate the results.  
34  
35  
36  
37  
38

39 **ETHICS AND DISSEMINATION:**  
40

41 208 This study is a systematic review using aggregated published data, without accessing any  
42  
43  
44 209 personal identifiable information, hence there are no significant ethical or safety concerns.  
45  
46 210 The results of this study will be presented at international conferences and submitted for  
47  
48  
49 211 publication in a peer-reviewed open-access journal. Authors will use their networks to  
50  
51 212 encourage broad dissemination of the results.  
52  
53  
54  
55  
56  
57  
58  
59  
60

213 **REFERENCES:**

- 214 1. American Diabetes Association. Diagnosis and Classification of Diabetes Mellitus.  
215 Diabetes Care. 2010 Jan;33(Suppl 1):S62–9.
- 216 2. Alberti K, Zimmet P. Definition, diagnosis and classification of diabetes mellitus and its  
217 complications. Part 1: diagnosis and classification of diabetes mellitus provisional report  
218 of a WHO consultation. Diabet Med J Br Diabet Assoc. 1998 Jul;15(7):539–53.
- 219 3. International Diabetes Federation. International Diabetes Federation Atlas (9th Edition).  
220 2019 [cited 2020 May 1]; Available from: <https://www.diabetesatlas.org/>
- 221 4. Tabák AG, Jokela M, Akbaraly TN, Brunner EJ, Kivimäki M, Witte DR. Trajectories of  
222 glycaemia, insulin sensitivity, and insulin secretion before diagnosis of type 2 diabetes:  
223 an analysis from the Whitehall II study. Lancet Lond Engl. 2009 Jun 27;373(9682):2215–  
224 21.
- 225 5. Vistisen D, Witte DR, Brunner EJ, Kivimäki M, Tabák A, Jørgensen ME, et al. Risk of  
226 cardiovascular disease and death in individuals with prediabetes defined by different  
227 criteria: the Whitehall II study. Diabetes Care. 2018 Apr;41(4):899–906.
- 228 6. Tabák AG, Herder C, Rathmann W, Brunner EJ, Kivimäki M. Prediabetes: a high-risk state  
229 for diabetes development. The Lancet. 2012 Jun 16;379(9833):2279–90.
- 230 7. Lee CC, Perkins BA, Kayaniyl S, Harris SB, Retnakaran R, Gerstein HC, et al. Peripheral  
231 neuropathy and nerve dysfunction in individuals at high risk for type 2 diabetes: The  
232 PROMISE Cohort. Diabetes Care. 2015 May;38(5):793–800.
- 233 8. Azmi S, Ferdousi M, Petropoulos IN, Ponirakis G, Alam U, Fadavi H, et al. Corneal  
234 confocal microscopy identifies small-fiber neuropathy in subjects with impaired glucose  
235 tolerance who develop type 2 diabetes. Diabetes Care. 2015 Aug;38(8):1502–8.
- 236 9. Brownrigg JRW, Hughes CO, Burleigh D, Karthikesalingam A, Patterson BO, Holt PJ, et al.  
237 Microvascular disease and risk of cardiovascular events among individuals with type 2  
238 diabetes: a population-level cohort study. Lancet Diabetes Endocrinol. 2016;4(7):588–  
239 97.
- 240 10. Gong Q, Zhang P, Wang J, Ma J, An Y, Chen Y, et al. Morbidity and mortality after  
241 lifestyle intervention for people with impaired glucose tolerance: 30-year results of the  
242 Da Qing Diabetes Prevention Outcome Study. Lancet Diabetes Endocrinol. 2019  
243 Jun;7(6):452–61.
- 244 11. Yau JWY, Rogers SL, Kawasaki R, Lamoureux EL, Kowalski JW, Bek T, et al. Global  
245 prevalence and major risk factors of diabetic retinopathy. Diabetes Care. 2012 Mar  
246 1;35(3):556–64.
- 247 12. Cheung N, Mitchell P, Wong TY. Diabetic retinopathy. Lancet Lond Engl. 2010 Jul  
248 10;376(9735):124–36.

- 1  
2  
3 249 13. National Eye Institute. People with diabetes can prevent vision loss. 2019; Available  
4 250 from: <https://www.nei.nih.gov/sites/default/files/2019-06/diabetes-prevent-vision->  
5 251 [loss.pdf](https://www.nei.nih.gov/sites/default/files/2019-06/diabetes-prevent-vision-loss.pdf)  
6  
7  
8 252 14. Wong TY, Klein R, Sharrett AR, Manolio TA, Hubbard LD, Marino EK, et al. The  
9 253 prevalence and risk factors of retinal microvascular abnormalities in older persons: The  
10 254 Cardiovascular Health Study. *Ophthalmology*. 2003 Apr;110(4):658–66.  
11  
12 255 15. Nguyen TT, Wang JJ, Wong TY. Retinal vascular changes in pre-diabetes and  
13 256 prehypertension: new findings and their research and clinical implications. *Diabetes*  
14 257 *Care*. 2007 Oct;30(10):2708–15.  
15  
16 258 16. McGowan J, Sampson M, Salzwedel DM, Cogo E, Foerster V, Lefebvre C. PRESS Peer  
17 259 Review of Electronic Search Strategies: 2015 guideline statement. *J Clin Epidemiol*.  
18 260 2016;75:40–6.  
19  
20 261 17. Wilkinson CP, Ferris FL, Klein RE, Lee PP, Agardh CD, Davis M, et al. Proposed  
21 262 international clinical diabetic retinopathy and diabetic macular edema disease severity  
22 263 scales. *Ophthalmology*. 2003 Sep;110(9):1677–82.  
23  
24 264 18. Alberti KGMM, Eckel RH, Grundy SM, Zimmet PZ, Cleeman JI, Donato KA, et al.  
25 265 Harmonizing the metabolic syndrome: a joint interim statement of the International  
26 266 Diabetes Federation Task Force on Epidemiology and Prevention; National Heart, Lung,  
27 267 and Blood Institute; American Heart Association; World Heart Federation; International  
28 268 Atherosclerosis Society; and International Association for the Study of Obesity.  
29 269 *Circulation*. 2009 Oct 20;120(16):1640–5.  
30  
31 270 19. American Diabetes Association. 2. Classification and Diagnosis of Diabetes: Standards of  
32 271 Medical Care in Diabetes-2018. *Diabetes Care*. 2018;41(Suppl 1):S13–27.  
33  
34 272 20. National Cholesterol Education Program (NCEP) Expert Panel on Detection, Evaluation,  
35 273 and Treatment of High Blood Cholesterol in Adults (Adult Treatment Panel III). Third  
36 274 Report of the National Cholesterol Education Program (NCEP) Expert Panel on  
37 275 Detection, Evaluation, and Treatment of High Blood Cholesterol in Adults (Adult  
38 276 Treatment Panel III) final report. *Circulation*. 2002 Dec 17;106(25):3143–421.  
39  
40 277 21. Yumuk V, Tsigos C, Fried M, Schindler K, Busetto L, Micic D, et al. European Guidelines  
41 278 for Obesity Management in Adults. *Obes Facts*. 2015;8(6):402–24.  
42  
43 279 22. Moher D, Liberati A, Tetzlaff J, Altman DG, PRISMA Group. Preferred reporting items for  
44 280 systematic reviews and meta-analyses: the PRISMA statement. *PLoS Med*. 2009 Jul  
45 281 21;6(7):e1000097.  
46  
47 282 23. Hoy D, Brooks P, Woolf A, Blyth F, March L, Bain C, et al. Assessing risk of bias in  
48 283 prevalence studies: modification of an existing tool and evidence of interrater  
49 284 agreement. *J Clin Epidemiol*. 2012 Sep;65(9):934–9.  
50  
51  
52  
53  
54  
55  
56  
57  
58  
59  
60

- 1  
2  
3 285 24. Guyatt GH, Oxman AD, Vist GE, Kunz R, Falck-Ytter Y, Alonso-Coello P, et al. GRADE: an  
4 286 emerging consensus on rating quality of evidence and strength of recommendations.  
5 287 BMJ. 2008 Apr 26;336(7650):924–6.  
6  
7  
8 288 25. Iorio A, Spencer FA, Falavigna M, Alba C, Lang E, Burnand B, et al. Use of GRADE for  
9 289 assessment of evidence about prognosis: rating confidence in estimates of event rates  
10 290 in broad categories of patients. BMJ. 2015 Mar 16;350:h870.  
11  
12  
13  
14

15 291 **AUTHORS' CONTRIBUTIONS:**

16  
17  
18 292 VK, UA and TLJ conceived the review topic. VK performed background exploratory searches  
19  
20 293 and drafted the initial search strategy. VK, JE and PN co-wrote the initial protocol. UA, SN,  
21  
22  
23 294 RAM and TLJ provided critical appraisal and senior oversight of the protocol.  
24  
25

26  
27 295 For the systematic review, VK and PN will perform the searches, data extraction and analysis.  
28  
29 296 JE will provide oversight of the searches, data analysis and extraction. SN will provide  
30  
31  
32 297 statistical input for data analysis. UA, RAM and TLJ will provide critical appraisal and senior  
33  
34 298 oversight of the final manuscript.  
35  
36  
37  
38  
39

40 299 **FUNDING STATEMENT:**

41  
42 300 This research received no specific grant from any funding agency in the public, commercial or  
43  
44 301 not-for-profit sectors.  
45  
46  
47  
48  
49

50 302 **COMPETING INTERESTS STATEMENT:**

51  
52  
53 303 The authors have no competing interests to declare.  
54  
55  
56  
57  
58  
59  
60

1  
2  
3 304 **KEY WORDS:**  
4

5  
6 305 Pre-diabetes, retinopathy, systematic review, humans.  
7  
8  
9

10  
11 306 **PLANNED START DATE:**  
12

13  
14 307 1 August 2020  
15  
16  
17

18  
19 308 **PLANNED END DATE:**  
20

21  
22 309 31 January 2021  
23  
24  
25

26  
27 310 **WORD COUNT:**  
28

29  
30 311 2,474 (excluding references and appendices)  
31  
32  
33  
34  
35  
36  
37  
38  
39  
40  
41  
42  
43  
44  
45  
46  
47  
48  
49  
50  
51  
52  
53  
54  
55  
56  
57  
58  
59  
60

**APPENDIX 1 – DRAFT MEDLINE SEARCH STRATEGY:**

1. exp Prevalence/
2. exp Incidence/
3. exp Epidemiology/
4. exp Epidemiologic Methods/
5. exp Population Characteristics/
6. (prevalen\* or occur\* or inciden\* or burden or epidemiolog\* or frequenc\* or rate).tw
7. Or/1-6
8. exp Glucose Intolerance/
9. exp Prediabetic State/
10. exp Hyperglycemia/
11. exp Glycated Hemoglobin A/
12. glucose intolerance.tw
13. (prediabet\* or pre-diabet\* or pre diabet\* or borderline diabet\*).tw
14. hyperglyc?emi\*.tw
15. ((impaired fasting adj2 glucose) or IFG or impaired FPG).tw
16. ((impaired glucose adj (tolerance or metabolism)) or IGT).tw
17. Or/8-16
18. exp Diabetic Retinopathy/
19. exp Retina/
20. microvasc\* adj2 (change\* or disease\* or dysfuncti\* or complicat\*).tw
21. (retinopathy or retinal).tw
22. Or/18-21
23. 7 and 17 and 22

1  
2  
3 24. exp animals/ not humans.sh  
4

5  
6 25. 23 not 24  
7

8 26. ...dedup 25  
9  
10  
11  
12  
13  
14  
15  
16  
17  
18  
19  
20  
21  
22  
23  
24  
25  
26  
27  
28  
29  
30  
31  
32  
33  
34  
35  
36  
37  
38  
39  
40  
41  
42  
43  
44  
45  
46  
47  
48  
49  
50  
51  
52  
53  
54  
55  
56  
57  
58  
59  
60

For peer review only



**APPENDIX 2 – CRITICAL APPRAISAL TOOL FOR PREVALENCE STUDIES USED BY HOY ET AL. (2012):**

| Name of author(s):   |                                                                                                                                                            |                                                                                                                                                                                                                                                 |               |
|----------------------|------------------------------------------------------------------------------------------------------------------------------------------------------------|-------------------------------------------------------------------------------------------------------------------------------------------------------------------------------------------------------------------------------------------------|---------------|
| Year of publication: |                                                                                                                                                            |                                                                                                                                                                                                                                                 |               |
| Study title:         |                                                                                                                                                            |                                                                                                                                                                                                                                                 |               |
| Risk of bias items   |                                                                                                                                                            | Risk of bias levels                                                                                                                                                                                                                             | Points scored |
| 1                    | Was the study's target population a close representation of the national population in relation to relevant variables, e.g. age, sex, occupation?          | <b>Yes (LOW RISK):</b> The study's target population was a close representation of the national population.                                                                                                                                     | <b>0</b>      |
|                      |                                                                                                                                                            | <b>No (HIGH RISK):</b> The study's target population was clearly NOT representative of the national population.                                                                                                                                 | <b>1</b>      |
| 2                    | Was the sampling frame a true or close representation of the target population?                                                                            | <b>Yes (LOW RISK):</b> The sampling frame was a true or close representation of the target population.                                                                                                                                          | <b>0</b>      |
|                      |                                                                                                                                                            | <b>No (HIGH RISK):</b> The sampling frame was NOT a true or close representation of the target population.                                                                                                                                      | <b>1</b>      |
| 3                    | Was some form of random selection used to select the sample, OR, was a census undertaken?                                                                  | <b>Yes (LOW RISK):</b> A census was undertaken, OR, some form of random selection was used to select the sample (e.g. simple random sampling, stratified random sampling, cluster sampling, systematic sampling).                               | <b>0</b>      |
|                      |                                                                                                                                                            | <b>No (HIGH RISK):</b> A census was NOT undertaken, AND some form of random selection was NOT used to select the sample.                                                                                                                        | <b>1</b>      |
| 4                    | Was the likelihood of non-response bias minimal?                                                                                                           | <b>Yes (LOW RISK):</b> The response rate for the study was $\geq 75\%$ , OR, an analysis was performed that showed no significant difference in relevant demographic characteristics between responders and non-responders                      | <b>0</b>      |
|                      |                                                                                                                                                            | <b>No (HIGH RISK):</b> The response rate was $< 75\%$ , and if any analysis comparing responders and non-responders was done, it showed a significant difference in relevant demographic characteristics between responders and non-responders. | <b>1</b>      |
| 5                    | Were data collected directly from the subjects (as opposed to a proxy)?                                                                                    | <b>Yes (LOW RISK):</b> All data were collected directly from the subjects.                                                                                                                                                                      | <b>0</b>      |
|                      |                                                                                                                                                            | <b>No (HIGH RISK):</b> In some instances, data were collected from a proxy.                                                                                                                                                                     | <b>1</b>      |
| 6                    | Was an acceptable case definition used in the study?                                                                                                       | <b>Yes (LOW RISK):</b> An acceptable case definition was used.                                                                                                                                                                                  | <b>0</b>      |
|                      |                                                                                                                                                            | <b>No (HIGH RISK):</b> An acceptable case definition was NOT used.                                                                                                                                                                              | <b>1</b>      |
| 7                    | Was the study instrument that measured the parameter of interest (e.g. prevalence of low back pain) shown to have reliability and validity (if necessary)? | <b>Yes (LOW RISK):</b> The study instrument had been shown to have reliability and validity (if this was necessary), e.g. test-re-test, piloting, validation in a previous study, etc.                                                          | <b>0</b>      |
|                      |                                                                                                                                                            | <b>No (HIGH RISK):</b> The study instrument had NOT been shown to have reliability or validity (if this was necessary).                                                                                                                         | <b>1</b>      |
| 8                    | Was the same mode of data collection used for all subjects?                                                                                                | <b>Yes (LOW RISK):</b> The same mode of data collection was used for all subjects.                                                                                                                                                              | <b>0</b>      |
|                      |                                                                                                                                                            | <b>No (HIGH RISK):</b> The same mode of data collection was NOT used for all subjects.                                                                                                                                                          | <b>1</b>      |
| 9                    | Were the numerator(s) and denominator(s) for the                                                                                                           | <b>Yes (LOW RISK):</b> The paper presented appropriate numerator(s) AND denominator(s) for the parameter of                                                                                                                                     | <b>0</b>      |

|    |                                           |                                                                                                                                                         |            |
|----|-------------------------------------------|---------------------------------------------------------------------------------------------------------------------------------------------------------|------------|
|    | appropriate                               | interest (e.g. the prevalence of low back pain).                                                                                                        |            |
|    |                                           | <b>No (HIGH RISK):</b> The paper did present numerator(s) AND denominator(s) for the parameter of interest but one or more of these were inappropriate. | <b>1</b>   |
| 10 | Summary on the overall risk of study bias | <b>LOW RISK</b>                                                                                                                                         | <b>0-3</b> |
|    |                                           | <b>MODERATE RISK</b>                                                                                                                                    | <b>4-6</b> |
|    |                                           | <b>HIGH RISK</b>                                                                                                                                        | <b>7-9</b> |

For peer review only

## SUPPLEMENTAL FILE – PRISMA–P 2015 CHECKLIST

This checklist has been adapted for use with systematic review protocol submissions to BioMed Central journals from Table 3 in Moher D et al: Preferred reporting items for systematic review and meta-analysis protocols (PRISMA–P) 2015 statement. *Systematic Reviews* 2015 4:1

An Editorial from the Editors-in-Chief of *Systematic Reviews* details why this checklist was adapted – Moher D, Stewart L & Shekelle P: Implementing PRISMA–P: recommendations for prospective authors. *Systematic Reviews* 2016 5:15

| Section/topic                     | #  | Checklist item                                                                                                                                                                                  | Information reported                |                          | Line number(s) |
|-----------------------------------|----|-------------------------------------------------------------------------------------------------------------------------------------------------------------------------------------------------|-------------------------------------|--------------------------|----------------|
|                                   |    |                                                                                                                                                                                                 | Yes                                 | No                       |                |
| <b>ADMINISTRATIVE INFORMATION</b> |    |                                                                                                                                                                                                 |                                     |                          |                |
| <b>Title</b>                      |    |                                                                                                                                                                                                 |                                     |                          |                |
| Identification                    | 1a | Identify the report as a protocol of a systematic review                                                                                                                                        | <input checked="" type="checkbox"/> | <input type="checkbox"/> | 2              |
| Update                            | 1b | If the protocol is for an update of a previous systematic review, identify as such                                                                                                              | <input type="checkbox"/>            | <input type="checkbox"/> | N/A            |
| <b>Registration</b>               | 2  | If registered, provide the name of the registry (e.g., PROSPERO) and registration number in the Abstract                                                                                        | <input checked="" type="checkbox"/> | <input type="checkbox"/> | 47-48          |
| <b>Authors</b>                    |    |                                                                                                                                                                                                 |                                     |                          |                |
| Contact                           | 3a | Provide name, institutional affiliation, and e-mail address of all protocol authors; provide physical mailing address of corresponding author                                                   | <input checked="" type="checkbox"/> | <input type="checkbox"/> | 3-16           |
| Contributions                     | 3b | Describe contributions of protocol authors and identify the guarantor of the review                                                                                                             | <input checked="" type="checkbox"/> | <input type="checkbox"/> | 291-298        |
| <b>Amendments</b>                 | 4  | If the protocol represents an amendment of a previously completed or published protocol, identify as such and list changes; otherwise, state plan for documenting important protocol amendments | <input checked="" type="checkbox"/> | <input type="checkbox"/> | 47-48          |
| <b>Support</b>                    |    |                                                                                                                                                                                                 |                                     |                          |                |
| Sources                           | 5a | Indicate sources of financial or other support for the review                                                                                                                                   | <input checked="" type="checkbox"/> | <input type="checkbox"/> |                |
| Sponsor                           | 5b | Provide name for the review funder and/or sponsor                                                                                                                                               | <input type="checkbox"/>            | <input type="checkbox"/> | N/A            |
| Role of sponsor/funder            | 5c | Describe roles of funder(s), sponsor(s), and/or institution(s), if any, in developing the protocol                                                                                              | <input type="checkbox"/>            | <input type="checkbox"/> | N/A            |
| <b>INTRODUCTION</b>               |    |                                                                                                                                                                                                 |                                     |                          |                |
| <b>Rationale</b>                  | 6  | Describe the rationale for the review in the context of what is already known                                                                                                                   | <input checked="" type="checkbox"/> | <input type="checkbox"/> | 56-89          |

| Section/topic                             | #   | Checklist item                                                                                                                                                                                                                              | Information reported                |                          | Line number(s) |
|-------------------------------------------|-----|---------------------------------------------------------------------------------------------------------------------------------------------------------------------------------------------------------------------------------------------|-------------------------------------|--------------------------|----------------|
|                                           |     |                                                                                                                                                                                                                                             | Yes                                 | No                       |                |
| <b>Objectives</b>                         | 7   | Provide an explicit statement of the question(s) the review will address with reference to participants, interventions, comparators, and outcomes (PICO)                                                                                    | <input checked="" type="checkbox"/> | <input type="checkbox"/> | 88-89          |
| <b>METHODS</b>                            |     |                                                                                                                                                                                                                                             |                                     |                          |                |
| <b>Eligibility criteria</b>               | 8   | Specify the study characteristics (e.g., PICO, study design, setting, time frame) and report characteristics (e.g., years considered, language, publication status) to be used as criteria for eligibility for the review                   | <input checked="" type="checkbox"/> | <input type="checkbox"/> | 103-117        |
| <b>Information sources</b>                | 9   | Describe all intended information sources (e.g., electronic databases, contact with study authors, trial registers, or other grey literature sources) with planned dates of coverage                                                        | <input checked="" type="checkbox"/> | <input type="checkbox"/> | 91-102         |
| <b>Search strategy</b>                    | 10  | Present draft of search strategy to be used for at least one electronic database, including planned limits, such that it could be repeated                                                                                                  | <input checked="" type="checkbox"/> | <input type="checkbox"/> | 94-97          |
| <b>STUDY RECORDS</b>                      |     |                                                                                                                                                                                                                                             |                                     |                          |                |
| Data management                           | 11a | Describe the mechanism(s) that will be used to manage records and data throughout the review                                                                                                                                                | <input checked="" type="checkbox"/> | <input type="checkbox"/> | 169-170        |
| Selection process                         | 11b | State the process that will be used for selecting studies (e.g., two independent reviewers) through each phase of the review (i.e., screening, eligibility, and inclusion in meta-analysis)                                                 | <input checked="" type="checkbox"/> | <input type="checkbox"/> | 141-149        |
| Data collection process                   | 11c | Describe planned method of extracting data from reports (e.g., piloting forms, done independently, in duplicate), any processes for obtaining and confirming data from investigators                                                        | <input checked="" type="checkbox"/> | <input type="checkbox"/> | 150-151        |
| <b>Data items</b>                         | 12  | List and define all variables for which data will be sought (e.g., PICO items, funding sources), any pre-planned data assumptions and simplifications                                                                                       | <input checked="" type="checkbox"/> | <input type="checkbox"/> | 151-159        |
| <b>Outcomes and prioritization</b>        | 13  | List and define all outcomes for which data will be sought, including prioritization of main and additional outcomes, with rationale                                                                                                        | <input checked="" type="checkbox"/> | <input type="checkbox"/> | 118-140        |
| <b>Risk of bias in individual studies</b> | 14  | Describe anticipated methods for assessing risk of bias of individual studies, including whether this will be done at the outcome or study level, or both; state how this information will be used in data synthesis                        | <input checked="" type="checkbox"/> | <input type="checkbox"/> | 160-168        |
| <b>DATA</b>                               |     |                                                                                                                                                                                                                                             |                                     |                          |                |
| <b>Synthesis</b>                          | 15a | Describe criteria under which study data will be quantitatively synthesized                                                                                                                                                                 | <input checked="" type="checkbox"/> | <input type="checkbox"/> | 169-172        |
|                                           | 15b | If data are appropriate for quantitative synthesis, describe planned summary measures, methods of handling data, and methods of combining data from studies, including any planned exploration of consistency (e.g., $I^2$ , Kendall's tau) | <input checked="" type="checkbox"/> | <input type="checkbox"/> | 173-176        |
|                                           | 15c | Describe any proposed additional analyses (e.g., sensitivity or subgroup analyses, meta-regression)                                                                                                                                         | <input checked="" type="checkbox"/> | <input type="checkbox"/> | 180-192        |
|                                           | 15d | If quantitative synthesis is not appropriate, describe the type of summary planned                                                                                                                                                          | <input checked="" type="checkbox"/> | <input type="checkbox"/> | 177-179        |

| Section/topic                            | #  | Checklist item                                                                                                              | Information reported                |                          | Line number(s) |
|------------------------------------------|----|-----------------------------------------------------------------------------------------------------------------------------|-------------------------------------|--------------------------|----------------|
|                                          |    |                                                                                                                             | Yes                                 | No                       |                |
| <b>Meta-bias(es)</b>                     | 16 | Specify any planned assessment of meta-bias(es) (e.g., publication bias across studies, selective reporting within studies) | <input checked="" type="checkbox"/> | <input type="checkbox"/> | 193-194        |
| <b>Confidence in cumulative evidence</b> | 17 | Describe how the strength of the body of evidence will be assessed (e.g., GRADE)                                            | <input checked="" type="checkbox"/> | <input type="checkbox"/> | 195-200        |

For peer review only
