# Supplementary material for: Prevalence of retinopathy in prediabetes: protocol for a systematic review and meta-analysis
Source: PubMed Central journal article supplement — BMJ Open. 2021 Jan 7;11(1):e040997. doi: 10.1136/bmjopen-2020-040997 (PMC7797244; doi:10.1136/bmjopen-2020-040997), 2021-01-07
Supplement: bmjopen-2020-040997supp001.pdf [file bmjopen-2020-040997supp001.pdf]

**APPENDIX 1 – DRAFT MEDLINE SEARCH STRATEGY:**

1. exp Prevalence/
2. exp Incidence/
3. exp Epidemiology/
4. exp Epidemiologic Methods/
5. exp Population Characteristics/
6. (prevalen\* or occur\* or inciden\* or burden or epidemiolog\* or frequenc\* or rate).tw
7. Or/1-6
8. exp Glucose Intolerance/
9. exp Prediabetic State/
10. exp Hyperglycemia/
11. exp Glycated Hemoglobin A/
12. glucose intolerance.tw
13. (prediabet\* or pre-diabet\* or pre diabet\* or borderline diabet\*).tw
14. hyperglyc?emi\*.tw
15. ((impaired fasting adj2 glucose) or IFG or impaired FPG).tw
16. ((impaired glucose adj (tolerance or metabolism)) or IGT).tw
17. Or/8-16
18. exp Diabetic Retinopathy/
19. exp Retina/
20. microvasc\* adj2 (change\* or disease\* or dysfuncti\* or complicat\*).tw
21. (retinopathy or retinal).tw
22. Or/18-21
23. 7 and 17 and 22

24. exp animals/ not humans.sh

25. 23 not 24

26. ..dedup 25
