# Supplementary material for: Prevalence of retinopathy in prediabetes: protocol for a systematic review and meta-analysis
Source: HighWire-hosted journal article supplement (doi:10.1136/bmjopen-2020-040997), 2021-01-01
Supplement: bmjopen-2020-040997supp002_data_supplement.pdf [file bmjopen-2020-040997supp002_data_supplement.pdf]

**APPENDIX 2 – CRITICAL APPRAISAL TOOL FOR PREVALENCE STUDIES USED BY HOY ET AL. (2012):**

| Name of author(s):<br>Year of publication:<br>Study title: |                                                                                                                                                            |                                                                                                                                                                                                                                                 |          |
|------------------------------------------------------------|------------------------------------------------------------------------------------------------------------------------------------------------------------|-------------------------------------------------------------------------------------------------------------------------------------------------------------------------------------------------------------------------------------------------|----------|
| Risk of bias items                                         | Risk of bias levels                                                                                                                                        | Points scored                                                                                                                                                                                                                                   |          |
| 1                                                          | Was the study's target population a close representation of the national population in relation to relevant variables, e.g. age, sex, occupation?          | <b>Yes (LOW RISK):</b> The study's target population was a close representation of the national population.                                                                                                                                     | <b>0</b> |
|                                                            |                                                                                                                                                            | <b>No (HIGH RISK):</b> The study's target population was clearly NOT representative of the national population.                                                                                                                                 | <b>1</b> |
| 2                                                          | Was the sampling frame a true or close representation of the target population?                                                                            | <b>Yes (LOW RISK):</b> The sampling frame was a true or close representation of the target population.                                                                                                                                          | <b>0</b> |
|                                                            |                                                                                                                                                            | <b>No (HIGH RISK):</b> The sampling frame was NOT a true or close representation of the target population.                                                                                                                                      | <b>1</b> |
| 3                                                          | Was some form of random selection used to select the sample, OR, was a census undertaken?                                                                  | <b>Yes (LOW RISK):</b> A census was undertaken, OR, some form of random selection was used to select the sample (e.g. simple random sampling, stratified random sampling, cluster sampling, systematic sampling).                               | <b>0</b> |
|                                                            |                                                                                                                                                            | <b>No (HIGH RISK):</b> A census was NOT undertaken, AND some form of random selection was NOT used to select the sample.                                                                                                                        | <b>1</b> |
| 4                                                          | Was the likelihood of non-response bias minimal?                                                                                                           | <b>Yes (LOW RISK):</b> The response rate for the study was $\geq 75\%$ , OR, an analysis was performed that showed no significant difference in relevant demographic characteristics between responders and non-responders                      | <b>0</b> |
|                                                            |                                                                                                                                                            | <b>No (HIGH RISK):</b> The response rate was $< 75\%$ , and if any analysis comparing responders and non-responders was done, it showed a significant difference in relevant demographic characteristics between responders and non-responders. | <b>1</b> |
| 5                                                          | Were data collected directly from the subjects (as opposed to a proxy)?                                                                                    | <b>Yes (LOW RISK):</b> All data were collected directly from the subjects.                                                                                                                                                                      | <b>0</b> |
|                                                            |                                                                                                                                                            | <b>No (HIGH RISK):</b> In some instances, data were collected from a proxy.                                                                                                                                                                     | <b>1</b> |
| 6                                                          | Was an acceptable case definition used in the study?                                                                                                       | <b>Yes (LOW RISK):</b> An acceptable case definition was used.                                                                                                                                                                                  | <b>0</b> |
|                                                            |                                                                                                                                                            | <b>No (HIGH RISK):</b> An acceptable case definition was NOT used.                                                                                                                                                                              | <b>1</b> |
| 7                                                          | Was the study instrument that measured the parameter of interest (e.g. prevalence of low back pain) shown to have reliability and validity (if necessary)? | <b>Yes (LOW RISK):</b> The study instrument had been shown to have reliability and validity (if this was necessary), e.g. test-re-test, piloting, validation in a previous study, etc.                                                          | <b>0</b> |
|                                                            |                                                                                                                                                            | <b>No (HIGH RISK):</b> The study instrument had NOT been shown to have reliability or validity (if this was necessary).                                                                                                                         | <b>1</b> |
| 8                                                          | Was the same mode of data collection used for all subjects?                                                                                                | <b>Yes (LOW RISK):</b> The same mode of data collection was used for all subjects.                                                                                                                                                              | <b>0</b> |
|                                                            |                                                                                                                                                            | <b>No (HIGH RISK):</b> The same mode of data collection was NOT used for all subjects.                                                                                                                                                          | <b>1</b> |
| 9                                                          | Were the numerator(s) and denominator(s) for the parameter of interest                                                                                     | <b>Yes (LOW RISK):</b> The paper presented appropriate numerator(s) AND denominator(s) for the parameter of interest (e.g. the prevalence of low                                                                                                | <b>0</b> |

|    |                                           |                                                                                                                                                         |            |
|----|-------------------------------------------|---------------------------------------------------------------------------------------------------------------------------------------------------------|------------|
|    | appropriate                               | back pain).                                                                                                                                             |            |
|    |                                           | <b>No (HIGH RISK):</b> The paper did present numerator(s) AND denominator(s) for the parameter of interest but one or more of these were inappropriate. | <b>1</b>   |
| 10 | Summary on the overall risk of study bias | <b>LOW RISK</b>                                                                                                                                         | <b>0-3</b> |
|    |                                           | <b>MODERATE RISK</b>                                                                                                                                    | <b>4-6</b> |
|    |                                           | <b>HIGH RISK</b>                                                                                                                                        | <b>7-9</b> |
